# Supplementary material
Source: ML conference proceedings conference paper supplement (https://openaccess.thecvf.com/content/ICCV2025/html/Li_Open-Unfairness_Adversarial_Mitigation_ICCV_2025_paper.html)
Supplement: Supplementary file 1 [file Li_Open-Unfairness_Adversarial_Mitigation_ICCV_2025_supplemental.pdf]

# Appendix for “Open-Unfairness Adversarial Mitigation for Generalized Deepfake Detection”

## 1. Complexity analysis

Table 1. Comparison of computation costs.

| Method              | Eff-b3<br>[2] | UCF<br>[3]              | LSDA<br>[4]             | FG-DD<br>[1]            | AdvOU<br>Ours                |
|---------------------|---------------|-------------------------|-------------------------|-------------------------|------------------------------|
| Num. Param.(M)      | 10.70         | 26.09 <sup>+15.39</sup> | 96.71 <sup>+86.01</sup> | 38.77 <sup>+28.07</sup> | <b>13.03<sup>+2.33</sup></b> |
| Train time(s/epoch) | 942.7 ± 5.1   | 3568.1 ± 124.7          | 3510.9 ± 4023.8         | 7072.6 ± 18.4           | <b>1677.6 ± 101.4</b>        |

We compare the parameter count and per-epoch training time of our AdvOU framework with state-of-the-art methods. As shown in Table 1, AdvOU introduces only 2.33M additional parameters to the EfficientNet-b3 (Eff-b3) backbone, attributable to its lightweight unfairness discoverer module. With a training cost of 1678 seconds/epoch calculated over 5 times of training epoch, AdvOU remains competitive against UCF [3], LSDA [4], and FG-DD [1]. This efficiency stems from structural advantages: UCF [3] and FG-DD [1] require computationally reconstruction operations, while LSDA [4] relies on multi-teacher distillation that scales parameter overhead. In contrast, AdvOU achieves fairness integration solely through alternating optimization between the unfairness discoverer and deepfake detector.

## 2. Trade-offs between fairness and accuracy

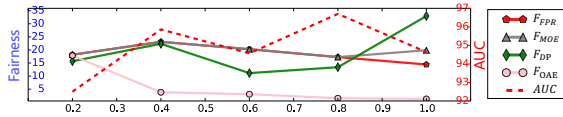

Figure 1. Trade-offs between fairness and accuracy metrics.

We analyze the trade-off between fairness and accuracy on FF++ by varying the weight of the fairness mitigation loss in Equation 9. As shown in Figure 1, increasing the mitigation strength (x-axis) steadily improves  $F_{OAE}$  and  $F_{FPR}$ , while other fairness metrics and AUC follow a rise-then-drop trend. These results underscore the importance of balancing fairness and accuracy when addressing open unfairness in deepfake detection.

## 3. Hyperparameter analysis

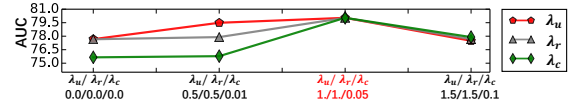

Figure 2. Sensitivity analysis for hyperparameters.

We conduct sensitivity analysis on three key hyperparameters ( $\lambda_u$  in Equation 4 as well as  $\lambda_r$  and  $\lambda_c$  in Equation 9) using FF++ for training and evaluating generalization on unseen datasets (CDF, DFDC and DFD). Figure 2 illustrates the trade-off between hyperparameter values and cross-dataset average AUC. Our analysis reveals that performance is most sensitive to  $\lambda_c$ : AUC rises from 75.65 ( $\lambda_c = 0.0$ ) to 80.04 ( $\lambda_c = 0.1$ ) before declining to 77.90 at  $\lambda_c = 0.15$ . This non-monotonic relationship suggests  $\lambda_c$  critically balances robustness against unfairness-induced feature perturbations, with optimal regularization occurring at  $\lambda_c = 0.1$ .

## References

- [1] Li Lin, Xinan He, Yan Ju, Xin Wang, Feng Ding, and Shu Hu. Preserving fairness generalization in deepfake detection. In *Proceedings of the IEEE/CVF Conference on Computer Vision and Pattern Recognition*, pages 16815–16825, 2024. 1
- [2] Mingxing Tan and Quoc Le. Efficientnet: Rethinking model scaling for convolutional neural networks. In *International conference on machine learning*, pages 6105–6114. PMLR, 2019. 1
- [3] Zhiyuan Yan, Yong Zhang, Yanbo Fan, and Baoyuan Wu. Ucf: Uncovering common features for generalizable deepfake detection. In *Proceedings of the IEEE/CVF International Conference on Computer Vision*, pages 22412–22423, 2023. 1
- [4] Zhiyuan Yan, Yuhao Luo, Siwei Lyu, Qingshan Liu, and Baoyuan Wu. Transcending forgery specificity with latent space augmentation for generalizable deepfake detection. In *Proceedings of the IEEE/CVF Conference on Computer Vision and Pattern Recognition*, pages 8984–8994, 2024. 1
